# Supplementary material for: Vildagliptin Improves Endothelium-Dependent Vasodilatation in Type 2 Diabetes
Source: PubMed Central journal article supplement — Diabetes Care. 2011 Aug 19;34(9):2072–7. doi: 10.2337/dc10-2421 (PMC3161271; doi:10.2337/dc10-2421), 2011-08-19
Supplement: supp_dc10-2421v102421_DC102421SupplementaryData.pdf [file supp_dc10-2421v102421_DC102421SupplementaryData.pdf]

SUPPLEMENTARY DATA

**Supplementary Table 1.** Effect of vildagliptin on various vascular and metabolic parameters. Statistical analysis by paired Student's t test

|                               | Vildagliptin | Acarbose  | P-value |
|-------------------------------|--------------|-----------|---------|
| Diastolic BP (mmHg)           | 73.3±2.4     | 74.9±2.3  | 0.22    |
| Mean arterial pressure (mmHg) | 100.7±3.2    | 102.4±2.8 | 0.27    |
| Systolic BP (mmHg)            | 143.1±4.7    | 145.2±3.6 | 0.37    |
| Heart rate                    | 67.9±2.1     | 66.3±2.5  | 0.41    |
| HbA1c(%)                      | 6.73±0.12    | 6.84±0.12 | 0.07    |
| Fasting glucose (mmol/l)      | 6.62±0.27    | 7.59±0.28 | <0.0001 |
| Fasting insulin (mE/l)        | 14.5±2.0     | 15.6±2.4  | 0.22    |
| Body weight                   | 88.2±3.9     | 88.1±3.8  | 0.68    |
| Total cholesterol (mmol/l)    | 4.10±0.23    | 4.33±0.25 | 0.09    |
| Triglycerides (mmol/l)        | 1.52±0.14    | 1.61±0.20 | 0.66    |
| HDL (mmol/l)                  | 1.09±0.05    | 1.1±0.05  | 0.24    |
| LDL (mmol/l)                  | 2.32±0.21    | 2.37±0.24 | 0.82    |
